# Supplementary material
Source: PubMed Central journal article supplement (PMC2692045)
Supplement: NIHMS113307-supplement-supplement_1.pdf [file NIHMS113307-supplement-supplement_1.pdf]

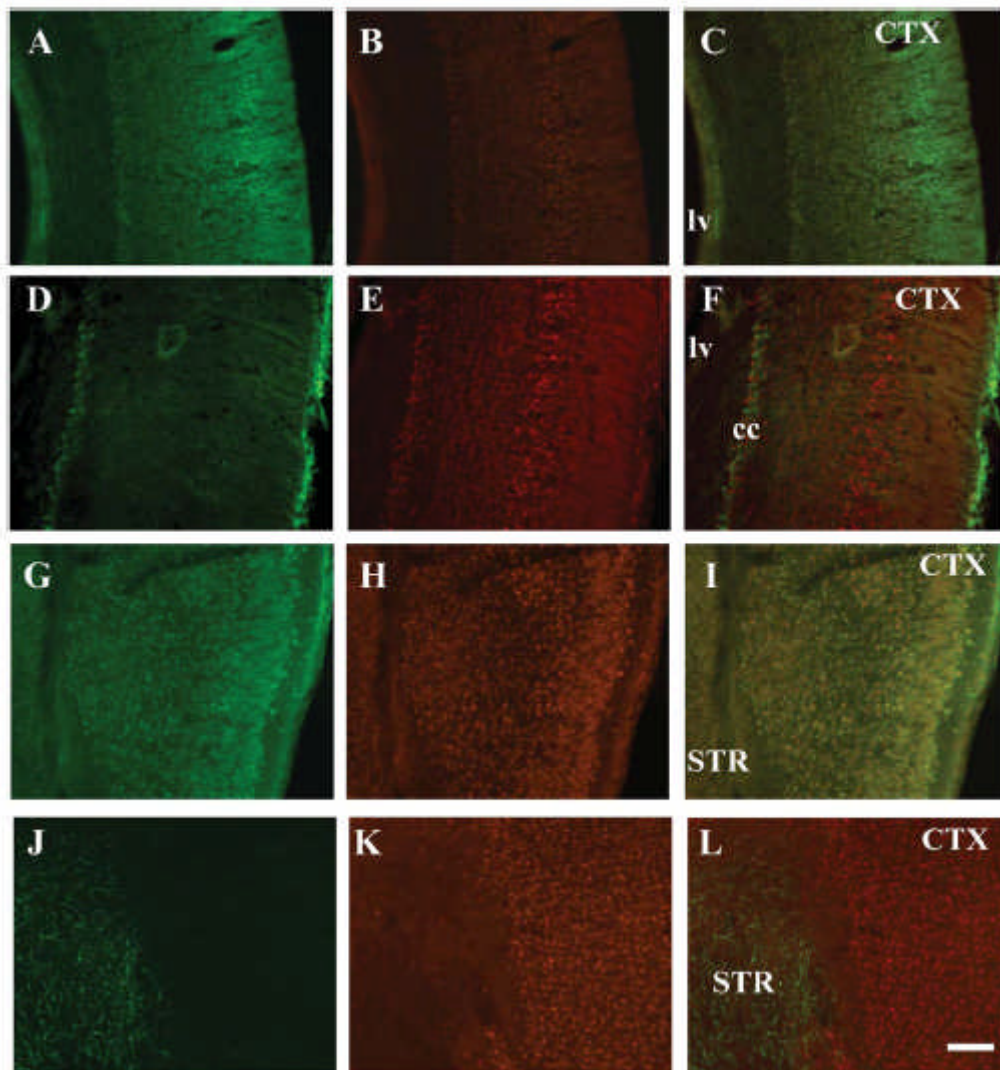

**Supplementary Fig. 1. ADAR1 and ADAR2 protein colocalize with NeuN, but not GFAP in P0 forebrain.** Coronal sections of P0 mouse brain were stained with specific antibodies against NeuN (**A, G**), GFAP (**D, J**), ADAR1 (**B, E**), and ADAR2 (**H, K**). As in the adult, overlaid images (**C, F, I, L**) of P0 tissue demonstrate prominent colocalization of ADAR1 and ADAR2 with NeuN, but not GFAP. Scale bar = 200  $\mu$ m.
